# Supplementary material for: Digital health for Barangay Health Workers: a mixed-methods baseline assessment in Quezon, Philippines
Source: Research Square preprint supplement (doi:10.21203/rs.3.rs-7216218/v1), 2025-09-09
Supplement: Supplementary file 1 [file 0d601eadeb986b944083ae21.docx]

Supplemental material for:

*Digital health for Barangay Health Workers: a mixed‑methods baseline assessment in Quezon Province, Philippines*

**Focus Group Discussion Questions for Community Members**

| Name of Staff  Member conducting FGD |  | |
| --- | --- | --- |
| Date of FGD |  | |
| Location |  | |
| Gender and age breakdown of participants | Females | Males |
| <18 years ______ | <18 years ______ |
| 19-35 years _______ | 19-35 years _______ |
| 36+ years_______ | 36+ years_______ |

**Introduction and Consent:**

Hello, our names are _________ and we are working with CARE Philippines. We are here to discuss the services you received from BHWs, the confidence in their work, their well-being, and your overall perception of them.

This discussion should take no more than [INSERT MINUTES]. We ask that everyone participates actively if you are comfortable to do so. We also ask that everyone takes turns speaking, and that there are no interruptions, and you respect each other’s views. Your participation is completely voluntary, and you can choose not to answer any questions. All of your responses will be kept confidential, and your names will not be used in any reports or publications.

Do you have any questions? Does anyone wish to leave? May we begin now?

**Facilitation Guide**

**A. Services from BHWs**

1. Have you received any services from your community’s BHW in the past 3 months?
2. What type of services have you received?
3. How would you describe the BHWs services?
   1. How satisfied are you with the BHWs delivery of services?
   2. If you’re not satisfied, why?

4. How do you think the services from BHWs can be improved?

**B. Demand for health services**

1. What do you think are the most important services provided by your BHWs in your community? Why do you think so?
2. What do you think are the services that your community needs but is not currently provided by your BHWs?

**C. Respect and trust to BHWs**

1. How much are your BHWs trusted to provide quality healthcare to your community members?
   1. What do you think contributes to this perception?
   2. How do you think BHWs can be trusted more in your community?
2. Do you personally trust your BHWs to provide you with quality healthcare services?
   1. Why or why not?
3. How do you think BHWs can be supported to enable their provision of quality healthcare services?
4. Is there anything else you’d like to share about BHWs’ services?
