# Supplementary material for: Digital health for Barangay Health Workers: a mixed-methods baseline assessment in Quezon, Philippines
Source: Research Square preprint supplement (doi:10.21203/rs.3.rs-7216218/v1), 2025-09-09
Supplement: Supplementary file 2 [file 2df5e69385f7d0bfd484b667.docx]

Supplemental material for:

*Digital health for Barangay Health Workers: a mixed‑methods baseline assessment in Quezon Province, Philippines*
**Table S1** Community member satisfaction with BHW service types.

| **Service** | **n** | **Very dissatisfied** | **Dissatisfied** | **Neutral** | **Satisfied** | **Very satisfied** | **Not applicable** |
| --- | --- | --- | --- | --- | --- | --- | --- |
|  |  | n (%) | n (%) | n (%) | n (%) | n (%) | n (%) |
| Awareness raising orientation | 114 | 1 (0.9) | 5 (4.4) | 36 (31.6) | 31 (27.2) | 36 (31.6) | 5 (4.4) |
| Consultation | 118 | 2 (1.7) | 2 (1.7) | 36 (30.5) | 38 (32.2) | 37 (31.4) | 3 (2.5) |
| First aid | 117 | 0 (0.0) | 8 (6.8) | 41 (35.0) | 26 (22.2) | 33 (28.2) | 9 (7.7) |
| Patient referral | 117 | 0 (0.0) | 7 (6.0) | 43 (36.8) | 23 (19.7) | 26 (22.2) | 18 (15.4) |
| Others | 27 | 0 (0.0) | 8 (29.6) | 5 (18.5) | 3 (11.1) | 4 (14.8) | 7 (25.9) |

**Table S2** Community member ratings of six BHW competencies

| **Competency** | **n** | **Very poor** | **Poor** | **Acceptable** | **Good** | **Very good** |
| --- | --- | --- | --- | --- | --- | --- |
|  |  | n (%) | n (%) | n (%) | n (%) | n (%) |
| Helpfulness | 118 | 1 (0.8) | 1 (0.8) | 23 (19.5) | 33 (28.0) | 60 (50.8) |
| Provision of relevant health information | 117 | 1 (0.9) | 1 (0.9) | 27 (23.1) | 30 (25.6) | 58 (49.6) |
| Bias-free treatment | 118 | 1 (0.8) | 4 (3.4) | 25 (21.2) | 29 (24.6) | 59 (50.0) |
| Communication | 118 | 1 (0.8) | 2 (1.7) | 28 (23.7) | 36 (30.5) | 51 (43.2) |
| Punctuality | 118 | 1 (0.8) | 2 (1.7) | 30 (25.4) | 31 (26.3) | 54 (45.8) |
| Referral competence | 116 | 1 (0.9) | 2 (1.7) | 42 (36.2) | 23 (19.8) | 48 (41.4) |

**Table S3** BHW confidence in core health activities by age group

| **Service Area** | **18–30 years (M ± SD)** | **31–40 years (M ± SD)** | **41–59 years (M ± SD)** | **≥ 60 years (M ± SD)** | **Overall (M ± SD)** |
| --- | --- | --- | --- | --- | --- |
| Health communication | 3.17 ± 0.98 | 3.75 ± 1.22 | 4.12 ± 1.01 | 3.92 ± 1.31 | 3.89 ± 1.13 |
| Maternal health | 4.00 ± 1.10 | 4.50 ± 0.67 | 4.40 ± 0.87 | 3.83 ± 1.27 | 4.25 ± 0.97 |
| Child health | 3.67 ± 1.21 | 4.50 ± 0.67 | 4.04 ± 1.06 | 4.33 ± 0.89 | 4.16 ± 0.98 |
| Infectious diseases | 2.67 ± 1.37 | 4.00 ± 1.13 | 3.76 ± 1.13 | 4.33 ± 0.89 | 3.82 ± 1.17 |
| First aid | 3.33 ± 1.03 | 3.83 ± 1.40 | 3.92 ± 0.95 | 4.33 ± 0.78 | 3.93 ± 1.05 |
| Patient referral | 3.33 ± 1.03 | 4.25 ± 0.75 | 4.24 ± 0.97 | 4.08 ± 1.31 | 4.11 ± 1.03 |
| Disease prevention | 3.17 ± 0.75 | 4.00 ± 0.95 | 4.12 ± 0.88 | 4.17 ± 1.40 | 4.00 ± 1.04 |
| Community mobilization | 3.83 ± 1.17 | 4.67 ± 0.49 | 4.60 ± 0.65 | 4.75 ± 0.45 | 4.56 ± 0.69 |

***Note.*** *M = Mean; SD = Standard Deviation. Values reflect BHWs’ self-reported confidence (1 = No confidence to 5 = High confidence) in delivering health services, by age group.*

**Table S4** BHW interest in additional training topics

| **Topic** | **Yes**  **n (%)** | **No**  **n (%)** |
| --- | --- | --- |
| Adolescent – Adolescent relationships | 53 (96.4) | 2 (3.6) |
| Adolescent – Puberty | 54 (98.2) | 1 (1.8) |
| Adolescent – Sexual and reproductive health | 53 (96.4) | 2 (3.6) |
| BHW roles, rights, and safety | 53 (100) | 0 (0) |
| Diabetes | 53 (96.4) | 2 (3.6) |
| Disabilities in adults | 53 (98.1) | 1 (1.9) |
| Disabilities in childhood | 54 (98.2) | 1 (1.8) |
| Family planning biasfree | 55 (100) | 0 (0) |
| Violence against women and girls | 52 (96.3) | 2 (3.7) |
| HIV/AIDS | 50 (96.2) | 2 (3.8) |
| Mental health | 54 (98.2) | 1 (1.8) |
| NCD – Asthma | 53 (96.4) | 2 (3.6) |
| NCD – Cancer | 53 (96.4) | 2 (3.6) |
| NCD – Hypertension | 55 (100) | 0 (0) |
| NCD – Respiratory (non-severe TB) | 55 (100) | 0 (0) |
| Personal hygiene and sanitation (WASH) | 55 (100) | 0 (0) |
| Routine HH visits – first visit (introduction & tasks) | 49 (90.7) | 5 (9.3) |
| Routine HH visits – follow-up tasks | 51 (94.4) | 3 (5.6) |
| Routine HH visits – remaining biasfree | 53 (96.4) | 2 (3.6) |

***Note:*** *Values are number (n) and percentage (%) of BHWs indicating interest (“Yes”) or no interest (“No”) in each topic (total sample n = 55; denominators vary slightly due to item non‑response). Abbreviations: NCD, non‑communicable disease; WASH, water, sanitation and hygiene; HH, household.*
