# Supplementary material for: Digital health for Barangay Health Workers: a mixed-methods baseline assessment in Quezon, Philippines
Source: Research Square preprint supplement (doi:10.21203/rs.3.rs-7216218/v1), 2025-09-09
Supplement: Supplementary file 3 [file dfd58c0f7d50f77cdd3ee0af.docx]

Supplemental material for:

*Digital health for Barangay Health Workers: a mixed‑methods baseline assessment in Quezon Province, Philippines*

**Focus Group Discussion Questions for Barangay Health Workers**

| Name of Staff Members conducting FGD |  | |
| --- | --- | --- |
| Date of FGD |  | |
| Location |  | |
| Gender and age breakdown of participants | Females | Males |
| <18 years ______ | <18 years ______ |
| 19-35 years _______ | 19-35 years _______ |
| 36+ years_______ | 36+ years_______ |

**Introduction and Consent:**

Hello, our names are _________ and we are working with CARE Philippines. We are here to discuss the common daily situation of BHWs, the confidence in their work, their well-being, and to gather feedback on the modules produced in our project.

This discussion should take no more than [INSERT MINUTES]. We ask that everyone participates actively if you are comfortable to do so. We also ask that everyone takes turns speaking, and that there are no interruptions, and you respect each other’s views. Your participation is completely voluntary, and you can choose not to answer any questions. All of your responses will be kept confidential, and your names will not be used in any reports or publications.

Do you have any questions? Does anyone wish to leave? May we begin now?

**Facilitation Guide**

**A. Common day-to-day routine of a BHW**

1. Can you describe to us the common day-to-day routine of a BHW in your community?
2. How many patients does one (1) BHW monitor on average?
   1. Do you think this number is manageable?
   2. If not, why?
3. What are the most common cases you handle as BHWs in your community?
4. How many referrals do you do on average (per day or per month)?
   1. Where do you usually refer them?
   2. Do patients actually go to the health facilities when referred?

**B. Confidence in Quality of service**

1. What are the common services you provide your patients when visiting them?
2. How confident are you with the quality of services you provide?
3. What are the services you think you can improve on?
4. What are the usual feedback you receive from your community with regards to the quality of your services?
5. What are the barriers that prevent you from providing quality service to your patients?

**C. (Economic and Social) Well-being of BHWs**

1. What types of support do you receive from your local government as BHWs?
   1. How often do you receive this type of support? (To be specified depending on type of support)
   2. Are these support relevant to your needs to provide quality health care services?
   3. Are there other sources of support for BHWs other than the LGUs? What types of support do you receive from these other sources?
2. How would you describe your families’ capacity to meet its basic needs?
   1. What are the basic needs for your family?
   2. By being a BHW, are you able to contribute to meeting these basic needs of your family? Why or why not?
3. How would you describe the communities’ perception of BHWs?
   1. Do you agree with these perceptions?
   2. What do you think are the contributing factors to these perceptions?
4. If there are negative perceptions, how do you suggest these could be addressed?

**D. Perception on digital platforms**

1. Have you ever received training in accordance to the BHW manual? When are these trainings usually provided to a newly-hired BHW in your community? By who?
2. How would you describe an average BHWs’ capacity to use or navigate digital devices?
3. Have you ever completed a training via an app in a digital device before?
4. If to be provided with a device that contains modules on health care services, how would you describe your confidence in your capacity to use the device?

**E. Feedback on modules**

Spiel: We will show you the list of potential modules our app will contain, can you share with us your opinion of these modules?

1. Do you think these topics are relevant to your needs in providing quality health care services in the community?
2. Are the topics here the ones you need given the commonality of cases you handle in the community?
3. What are the least important topic here in your opinion?
4. Now what are the most important topics for you?
5. Are there other topics in health that are not included here but you think are highly-relevant to your needs as BHWs?
6. If we are to provide a digital module you can complete in a tablet, and that every module has is with a duration of ____ (cite average length of a module), how long would it take you to complete one module?

(Note: further explain the total amount of time (the videos) under one module runs for on average.

1. Is there anything you would like to share with us regarding your needs as BHWs in your community?
