# Supplementary material for: Digital health for Barangay Health Workers: a mixed-methods baseline assessment in Quezon, Philippines
Source: Research Square preprint supplement (doi:10.21203/rs.3.rs-7216218/v1), 2025-09-09
Supplement: Supplementary file 4 [file f74b64b09d11f25f2ea0437d.docx]

Supplemental material for:

*Digital health for Barangay Health Workers: a mixed‑methods baseline assessment in Quezon Province, Philippines*

**Key Informant Interview Guide**

| Name of Staff Members conducting Interview |  |
| --- | --- |
| Date of Interview |  |
| Location |  |

**Introduction and Consent:**

Hello, our names are _________ and we are working with CARE Philippines. We are here to discuss the common daily situation of BHWs, the confidence in their work, their well-being, and to gather feedback on the modules produced in our project.

This discussion should take no more than [INSERT MINUTES]. Your participation is completely voluntary, and you can choose not to answer any questions. All of your responses will be kept confidential, and your names will not be used in any reports or publications.

Do you have any questions? Does anyone wish to leave? May we begin now?

**A. Support for BHWs**

1. Can you walk us through how BHWs are capacitated from the time of recruitment?
2. What are the trainings available to BHWs?
3. Do BHW get certificates/ or certified for the trainings they took? If yes, how many of your BHWs certified? If not, why is that?
4. Other than training, what are other types of support provided to BHWs?

**B. Demand for health services**

1. What do you think are the services provided by your BHWs that are with the highest demand in your community? Why do you think so?
2. What do you think are the services that your community needs but is not currently provided by your BHWs?

**C. Respect and trust to BHWs**

1. How much are your BHWs trusted to provide quality healthcare to your community members?
   1. What do you think contributes to this perception?
   2. How do you think BHWs can be trusted more in your community?
2. Do you personally trust your BHWs to provide the community with quality healthcare services?
   1. Why or why not?
3. How do you think BHWs can be supported to enable their provision of quality healthcare services?
4. Is there anything else you’d like to share about BHWs’ services?
